# Supplementary material for: Extraction and Quantification of Phenolic Compounds in Maize
Source: HighWire-hosted journal article supplement (doi:10.1101/pdb.prot108576), 2024-08-26
Supplement: Supplemental_legends.docx [file Supplemental_legends.docx]

**TABLE S1: List of sample phenolic compounds that can be quantified using this protoco**l. The table includes the names (column 1) and the parameters required to create the targeted multiple reaction monitoring (MRM) method for 33 compounds investigated here in stem tissues of maize seedlings (21-day old). Included for each compound is the CAS Registry Number, the retention time, the MS polarity mode, the MS/MS (parent ion/ daughter ion) fragments, the molecular weight, the cone voltage, and the collision energy.

**TABLE S2:** Data normalization using apigenin as a sample compound to calculate absolute values (ng of compound/mg of dry weight) in this protocol.
