# Supplementary material for: Extraction and Quantification of Phenolic Compounds in Maize
Source: HighWire-hosted journal article supplement (doi:10.1101/pdb.prot108576), 2024-08-26
Supplement: SupplementalTable_S1.xlsx [file SupplementalTable_S1.xlsx]

## Sheet: Table S1
Phenolic compound	Source	Catalog number	CAS No.	Retention time	Ionization mode	MS/MS ESI fragments	Molecular weight	Cone voltage (V)	Collision energy (eV)
Apigeninidin	ChemFaces	CFN91863	1151-98-0	3.16	positive	255 > 171	255.24	22	16
Apigenin	Sigma-Aldrich	208-292-3	520-36-5	5.31	negative	269 > 117	270.05	50	34
Apigenin-7-O-glu	Sigma-Aldrich	209-430-5	2492-87-7	3.78	negative	431 > 268	432.4	40	22
Apimaysin	Provide by Maurice Snook (University of George)	-	-	4.11	negative	559 > 395	560.5	42	26
Caffeic acid	Sigma-Aldrich	206-361-2	331-39-5	2.51	negative	179 > 135	180.16	28	22
Chrysoeriol	ChemFaces	CFN98785	491-71-4	5.47	negative	299 > 284	300.26	42	22
Coniferyl aldehyde	Sigma-Aldrich	207-278-4	458-36-6	4.01	negative	177 > 162	178.18	28	22
Dihydrokaempferol	ChemFaces	CFN98736	480-20-6	4.06	negative	287 > 259	288.25	28	22
Dihydroquercetin	Supelco	207-543-4	480-18-2	3.49	negative	303 > 125	304.25	28	22
Eriodictyol	Sigma-Aldrich	MFCD00017312	4049-38-1	4.69	negative	287 > 151	288.25	34	16
Eriodictyol-7-O-glu	Sigma-Aldrich	254-225-6	38965-51-4	3.36	negative	449 > 287	450.39	28	28
Ferulic acid	Supelco	214-490-0	1135-24-6	3.45	negative	193 > 134	194.18	46	16
Isoorientin	ChemFaces	CFN98137	4261-42-1	2.81	negative	447 > 327	448.38	42	26
Kaempferol	Sigma-Aldrich	MFCD00016938	520-18-3	5.44	positive	287 > 153	286.23	50	28
Luteolin	Supelco	207-741-0	491-70-3	4.72	negative	285 > 133	286.24	50	34
Luteolin-7-O-glu	Supelco	226-365-8	5373-11-05	3.37	negative	447 > 285	448.37	46	28
Maysin	Provide by Maurice Snook (University of George)	-	-	4	negative	575 > 297	576.5	50	42
Naringenin	ChemFaces	CFN98742	67604-48-2	5.34	negative	271 > 151	275.25	34	22
Naringenin-7-O-glu	Sigma-Aldrich	208-464-8	529-55-5	3.83	negative	433 > 271	434.4	28	16
p-Coumaric acid	Sigma-Aldrich	MFCD00004399	501-98-4	3.16	positive	165 > 91	164.04	22	22
Phenylalanine	Supelco	200-568-1	63-91-2	1.3	negative	164 > 147	165.19	34	16
Quercetin	Sigma-Aldrich	204-187-1	849061-97-8	4.75	negative	301 > 273	302.23	34	16
Quinic acid	ChemFaces	CFN99930	77-95-2	0.83	negative	191 > 85	192.17	42	28
Rhamnosylisoorientin	Provide by Maurice Snook (University of George)	-	-	2.77	negative	593 > 298	593.5	50	42
Shikimic acid	ChemFaces	CFN99436	138-59-0	0.84	negative	173 > 93	174.15	28	16
Sinapic acid	Supelco	208-487-3	530-59-6	3.42	negative	223 > 121	224.21	28	34
Syringic acid	Supelco	208-486-8	530-57-4	2.65	positive	199 > 140	198.17	22	16
Syringol	ChemFaces	CFN92626	91-10-1	4.01	positive	155 > 123	154.16	16	10
Tricin	ChemFaces	CFN98841	520-32-1	5.41	negative	329 > 299	330.29	42	26
Vanillic acid	Sigma-Aldrich	204-466-8	121-34-6	2.58	positive	169 > 93	168.14	22	16
Vanillin	ChemFaces	CFN90463	121-33-5	3.24	positive	153 > 93	152.15	22	16
Vitexin	ChemFaces	CFN98601	3681-93-4	3.23	negative	431 > 311	432.4	40	22
4-Chlorogenic acid	ChemFaces	CFN99117	905-99-7	2.21	positive	355 > 163	354.31	22	16
TABLE S1: List of sample phenolic compounds that can be quantified using this protocol. The table includes the names (column 1) and the parameters required to create the targeted multiple reaction monitoring (MRM) method for 33 compounds investigated here in stem tissues of maize seedlings (21-day old). Included for each compound is the CAS Registry Number, the retention time, the MS polarity mod…
