# Supplementary material for: Extraction and Quantification of Phenolic Compounds in Maize
Source: HighWire-hosted journal article supplement (doi:10.1101/pdb.prot108576), 2024-08-26
Supplement: SupplementalTable_S2.xlsx [file SupplementalTable_S2.xlsx]

## Sheet: Normalization_absolute values
Sample name (maize line)	Biological replicate number	Compound	nM of compound	Extraction buffer volume (L)	nmol of compound in sample	Molecular weight of compound (ng/nmol)	ng of compound in sample	mg of dry weight	ng of compound/mg of dry weight
Mutant	1	Apigenin	1626	0.001	1.626	270.05	439.101	49.7	8.83504
Mutant	2	Apigenin	1484	0.001	1.484	270.05	400.754	50.2	7.98315
Mutant	3	Apigenin	724	0.001	0.724	270.05	195.516	48.9	3.99829
Mutant	4	Apigenin	886	0.001	0.886	270.05	239.264	49.5	4.83362
Mutant	5	Apigenin	988	0.001	0.988	270.05	266.809	49.5	5.39009
Wild type	1	Apigenin	76	0.001	0.076	270.05	20.5238	49.3	0.416304
Wild type	2	Apigenin	56	0.001	0.056	270.05	15.1228	49.5	0.305511
Wild type	3	Apigenin	90	0.001	0.09	270.05	24.3045	50	0.48609
Wild type	4	Apigenin	90	0.001	0.09	270.05	24.3045	50.1	0.48512
Wild type	5	Apigenin	58	0.001	0.058	270.05	15.6629	49.6	0.315784
Table S2: Data normalization using apigenin as a sample compound to calculate absolute values (ng of compound/mg of dry weight) in this protocol
